# Supplementary material for: Syntheses, structures, and magnetic properties of mixed-ligand complexes based on 3,6-bis(benzimidazol-1-yl)pyridazine
Source: Royal Society of Chemistry journal article supplement (doi:10.1039/c9ra03082d), 2019-01-01

**Table S1** Selected Bond Distances (Å) and Angles (deg) for Complexes **1-6**

| Complex 1                                     |            |                                                |            |
|-----------------------------------------------|------------|------------------------------------------------|------------|
| Ni(1)-O(1)                                    | 2.045(4)   | Ni(1)-O(5) <sup>#1</sup>                       | 2.264(4)   |
| Ni(1)-O(2)                                    | 2.038(4)   | Ni(1)-N(1)                                     | 2.077(5)   |
| Ni(1)-O(4) <sup>#1</sup>                      | 2.059(4)   | Ni(1)-N(6) <sup>#2</sup>                       | 2.080(5)   |
| O(5)-Ni(1) <sup>#3</sup>                      | 2.264(4)   |                                                |            |
| O(1)-Ni(1)-N(6) <sup>#2</sup>                 | 94.15(17)  | N(1)-Ni(1)-O(5) <sup>#1</sup>                  | 86.54(16)  |
| O(1)-Ni(1)-C(00R) <sup>#1</sup>               | 124.50(17) | O(1)-Ni(1)-O(4) <sup>#1</sup>                  | 94.26(16)  |
| O(2)-Ni(1)-O(1)                               | 94.93(16)  | N(1)-Ni(1)-C(00R) <sup>#1</sup>                | 91.18(18)  |
| O(1)-Ni(1)-N(1)                               | 91.61(17)  | N(6) <sup>#2</sup> -Ni(1)-O(5) <sup>#1</sup>   | 90.76(16)  |
| O(2)-Ni(1)-O(5) <sup>#1</sup>                 | 109.95(15) | N(6) <sup>#2</sup> -Ni(1)-C(00R) <sup>#1</sup> | 90.45(18)  |
| O(2)-Ni(1)-N(1)                               | 85.07(18)  | C(7)-N(1)-Ni(1)                                | 132.0(3)   |
| O(2)-Ni(1)-N(6) <sup>#2</sup>                 | 88.51(17)  | C(1)-O(2)-Ni(1)                                | 123.0(4)   |
| O(2)-Ni(1)-C(00R) <sup>#1</sup>               | 140.51(17) | C(00R)-O(4)-Ni(1) <sup>#3</sup>                | 94.4(4)    |
| O(4) <sup>#1</sup> -Ni(1)-O(5) <sup>#1</sup>  | 60.91(15)  | C(00R)-O(5)-Ni(1) <sup>#3</sup>                | 84.9(3)    |
| O(4) <sup>#1</sup> -Ni(1)-N(1)                | 95.05(18)  | C(6)-N(1)-Ni(1)                                | 121.6(4)   |
| O(4) <sup>#1</sup> -Ni(1)-N(6) <sup>#2</sup>  | 90.46(17)  |                                                |            |
| Complex 2                                     |            |                                                |            |
| Ni(1)-O(2)                                    | 1.9934(12) | Ni(1)-O(5) <sup>#1</sup>                       | 2.0823(13) |
| Ni(1)-O(1)                                    | 2.0719(12) | Ni(1)-N(1) <sup>#2</sup>                       | 2.1053(15) |
| Ni(1)-O(4) <sup>#1</sup>                      | 2.1362(12) | Ni(1)-N(6)                                     | 2.0879(15) |
| O(2)-Ni(1)-O(1)                               | 94.47(5)   | O(5)-C(25)-Ni(1) <sup>#3</sup>                 | 59.01(9)   |
| O(2)-Ni(1)-O(5) <sup>#1</sup>                 | 105.41(5)  | O(1)-Ni(1)-N(1) <sup>#2</sup>                  | 92.64(6)   |
| O(2)-Ni(1)-N(1) <sup>#2</sup>                 | 90.17(6)   | O(1)-Ni(1)-N(6)                                | 89.16(5)   |
| O(2)-Ni(1)-N(6)                               | 87.19(6)   | O(1)-Ni(1)-C(25) <sup>#1</sup>                 | 128.81(6)  |
| O(2)-Ni(1)-C(25) <sup>#1</sup>                | 136.69(5)  | C(19)-O(2)-Ni(1)                               | 127.05(12) |
| O(1)-Ni(1)-O(4) <sup>#1</sup>                 | 97.25(5)   | O(5) <sup>#1</sup> -Ni(1)-O(4) <sup>#1</sup>   | 62.86(5)   |
| O(5) <sup>#1</sup> -Ni(1)-N(6)                | 91.05(6)   | O(5) <sup>#1</sup> -Ni(1)-N(1) <sup>#2</sup>   | 88.11(6)   |
| N(6)-Ni(1)-C(25) <sup>#1</sup>                | 94.10(6)   | C(25)-O(4)-Ni(1) <sup>#3</sup>                 | 86.95(10)  |
| N(1) <sup>#2</sup> -Ni(1)-O(4) <sup>#1</sup>  | 89.69(5)   | C(25)-O(5)-Ni(1) <sup>#3</sup>                 | 89.63(10)  |
| N(1) <sup>#2</sup> -Ni(1)-C(25) <sup>#1</sup> | 86.73(6)   | C(7)-N(1)-Ni(1) <sup>#4</sup>                  | 121.84(13) |
| N(6)-Ni(1)-O(4) <sup>#1</sup>                 | 92.57(5)   | C(6)-N(1)-Ni(1) <sup>#4</sup>                  | 132.54(12) |
| C(13)-N(6)-Ni(1)                              | 130.24(12) | C(12)-N(6)-Ni(1)                               | 123.37(12) |
| Complex 3                                     |            |                                                |            |
| Ni(1)-O(1)                                    | 2.026(2)   | Ni(1)-O(4) <sup>#1</sup>                       | 2.086(3)   |
| Ni(1)-O(5) <sup>#1</sup>                      | 2.158(2)   | Ni(1)-N(1) <sup>#2</sup>                       | 2.084(3)   |
| Ni(1)-O(2)                                    | 2.030(3)   | Ni(1)-N(6)                                     | 2.062(3)   |
| O(1)-Ni(1)-O(2)                               | 94.91(11)  | N(1) <sup>#2</sup> -Ni(1)-C(26) <sup>#1</sup>  | 94.56(12)  |
| O(1)-Ni(1)-O(4) <sup>#1</sup>                 | 100.32(10) | N(6)-Ni(1)-O(5) <sup>#1</sup>                  | 86.14(11)  |
| O(1)-Ni(1)-N(1) <sup>#2</sup>                 | 89.32(11)  | N(6)-Ni(1)-O(4) <sup>#1</sup>                  | 87.16(12)  |
| O(1)-Ni(1)-N(6)                               | 95.58(11)  | O(4)-C(26)-Ni(1) <sup>#3</sup>                 | 58.59(19)  |
| O(1)-Ni(1)-C(26) <sup>#1</sup>                | 131.35(11) | N(6)-Ni(1)-C(26) <sup>#1</sup>                 | 84.35(12)  |
| N(1) <sup>#2</sup> -Ni(1)-O(4) <sup>#1</sup>  | 94.78(12)  | C(26)-O(5)-Ni(1) <sup>#3</sup>                 | 86.8(2)    |
| O(2)-Ni(1)-O(5) <sup>#1</sup>                 | 102.50(10) | C(19)-O(2)-Ni(1)                               | 123.9(2)   |
| O(2)-Ni(1)-O(4) <sup>#1</sup>                 | 164.76(9)  | C(26)-O(4)-Ni(1) <sup>#3</sup>                 | 90.4(2)    |
| O(2)-Ni(1)-N(1) <sup>#2</sup>                 | 85.63(12)  | C(7)-N(1)-Ni(1) <sup>#4</sup>                  | 120.4(2)   |
| O(2)-Ni(1)-N(6)                               | 91.09(11)  | O(5)-N(1)-Ni(1) <sup>#3</sup>                  | 61.84(18)  |

|                                              |            |                                              |           |
|----------------------------------------------|------------|----------------------------------------------|-----------|
| O(2)-Ni(1)-C(26) <sup>#1</sup>               | 133.73(12) | N(1) <sup>#2</sup> -Ni(1)-O(5) <sup>#1</sup> | 90.04(11) |
| O(4) <sup>#1</sup> -Ni(1)-O(5) <sup>#1</sup> | 62.28(10)  |                                              |           |

#### Complex 4

|                                              |            |                                              |            |
|----------------------------------------------|------------|----------------------------------------------|------------|
| Mn(1)-O(4)                                   | 2.087(3)   | Mn(1)-N(1)                                   | 2.274(4)   |
| Mn(1)-O(2) <sup>#1</sup>                     | 2.249(3)   | N(6)-Mn(1) <sup>#4</sup>                     | 2.267(4)   |
| Mn(1)-O(1) <sup>#1</sup>                     | 2.290(3)   | Mn(1)-O(5)                                   | 2.113(2)   |
| O(4)-Mn(1)-O(2) <sup>#1</sup>                | 118.16(10) | N(6) <sup>#2</sup> -Mn(1)-O(1) <sup>#1</sup> | 98.00(12)  |
| O(4)-Mn(1)-O(5)                              | 96.30(11)  | O(5)-Mn(1)-C(1) <sup>#1</sup>                | 115.70(11) |
| O(4)-Mn(1)-N(6) <sup>#2</sup>                | 86.39(13)  | N(6) <sup>#2</sup> -Mn(1)-C(1) <sup>#1</sup> | 102.84(12) |
| O(4)-Mn(1)-N(1)                              | 93.89(12)  | N(1)-Mn(1)-O(1) <sup>#1</sup>                | 82.08(12)  |
| O(4)-Mn(1)-C(1) <sup>#1</sup>                | 146.40(11) | N(1)-Mn(1)-C(1) <sup>#1</sup>                | 79.97(13)  |
| O(2) <sup>#1</sup> -Mn(1)-O(1) <sup>#1</sup> | 58.00(8)   | C(6)-O(4)-Mn(1)                              | 132.0(2)   |
| O(2) <sup>#1</sup> -Mn(1)-N(6) <sup>#2</sup> | 97.81(12)  | C(1)-O(2)-Mn(1) <sup>#3</sup>                | 90.1(2)    |
| O(2) <sup>#1</sup> -Mn(1)-N(1)               | 86.99(13)  | C(1)-O(1)-Mn(1) <sup>#3</sup>                | 88.4(2)    |
| O(5)-Mn(1)-N(1)                              | 84.63(17)  | C(25)-N(6)-Mn(1) <sup>#4</sup>               | 136.5(3)   |
| C(7)-N(1)-Mn(1)                              | 118.9(3)   | C(18)-N(6)-Mn(1) <sup>#4</sup>               | 115.9(3)   |
| O(5)-Mn(1)-O(2) <sup>#1</sup>                | 145.00(11) | O(1)-C(1)-Mn(1) <sup>#3</sup>                | 62.44(18)  |
| O(5)-Mn(1)-O(1) <sup>#1</sup>                | 87.17(10)  | C(13)-N(1)-Mn(1)                             | 134.2(3)   |
| O(5)-Mn(1)-N(6) <sup>#2</sup>                | 89.80(16)  |                                              |            |

#### Complex 5

|                                |            |                                              |            |
|--------------------------------|------------|----------------------------------------------|------------|
| Mn(1)-O(1)                     | 2.2982(14) | Mn(1)-N(7)                                   | 2.2466(18) |
| Mn(1)-O(1) <sup>#1</sup>       | 2.4382(15) | Mn(1)-N(6)                                   | 2.2856(16) |
| Mn(1)-O(1S)                    | 2.1503(15) | Mn(1)-N(1) <sup>#2</sup>                     | 2.3306(17) |
| Mn(1)-O(4)                     | 2.3921(15) |                                              |            |
| O(1)-Mn(1)-O(1) <sup>#1</sup>  | 71.25(6)   | N(7)-Mn(1)-N(1) <sup>#2</sup>                | 83.21(6)   |
| O(1)-Mn(1)-O(4)                | 139.90(5)  | N(6)-Mn(1)-O(1)                              | 86.47(5)   |
| O(1)-Mn(1)-N(1) <sup>#2</sup>  | 90.01(5)   | N(6)-Mn(1)-O(1) <sup>#1</sup>                | 91.64(5)   |
| O(1S)-Mn(1)-O(1)               | 147.26(6)  | N(6)-Mn(1)-O(4)                              | 90.19(5)   |
| O(1S)-Mn(1)-O(1) <sup>#1</sup> | 76.22(5)   | C(2)-N(1)-Mn(1) <sup>#3</sup>                | 140.13(13) |
| O(1S)-Mn(1)-O(4)               | 72.73(5)   | N(1) <sup>#2</sup> -Mn(1)-O(1) <sup>#1</sup> | 96.53(5)   |
| O(1S)-Mn(1)-N(7)               | 141.04(6)  | N(1) <sup>#2</sup> -Mn(1)-O(4)               | 86.18(5)   |
| O(1S)-Mn(1)-N(6)               | 98.23(6)   | Mn(1)-O(1)-Mn(1) <sup>#1</sup>               | 108.75(6)  |
| O(1S)-Mn(1)-N(1) <sup>#2</sup> | 90.04(6)   | C(19)-O(1)-Mn(1)                             | 118.00(12) |
| O(4)-Mn(1)-O(1) <sup>#1</sup>  | 148.84(5)  | C(19)-O(1)-Mn(1) <sup>#1</sup>               | 132.97(12) |
| N(7)-Mn(1)-O(1)                | 71.34(6)   | Mn(1)-O(1S)-H(1SA)                           | 110.2      |
| N(7)-Mn(1)-O(1) <sup>#1</sup>  | 142.59(5)  | C(24)-O(4)-Mn(1)                             | 119.35(13) |
| N(7)-Mn(1)-O(4)                | 68.57(6)   | C(21)-N(7)-Mn(1)                             | 121.99(13) |
| N(7)-Mn(1)-N(6)                | 86.36(6)   | C(20)-N(7)-Mn(1)                             | 118.64(13) |
| C(17)-N(6)-Mn(1)               | 132.28(12) | C(1)-N(1)-Mn(1) <sup>#3</sup>                | 114.87(13) |
| C(18)-N(6)-Mn(1)               | 122.66(13) |                                              |            |

#### Complex 6

|                               |            |                                 |            |
|-------------------------------|------------|---------------------------------|------------|
| Mn(1)-O(1)                    | 2.152(2)   | Mn(1)-O(4)                      | 2.1521(18) |
| Mn(1)-O(2)                    | 2.1380(19) | Mn(1)-N(1)                      | 2.242(2)   |
| Mn(1)-N(2)                    | 2.263(2)   |                                 |            |
| O(1)-Mn(1)-O(3) <sup>#1</sup> | 56.08(7)   | N(1)-Mn(1)-O(3) <sup>#1</sup>   | 87.55(8)   |
| O(1)-Mn(1)-N(1)               | 93.10(8)   | C(18) <sup>#4</sup> -N(1)-Mn(1) | 124.70(17) |
| O(1)-Mn(1)-N(2)               | 92.85(8)   | N(2)-Mn(1)-O(3) <sup>#1</sup>   | 87.13(8)   |
| O(2)-Mn(1)-O(1)               | 93.04(7)   | C(1)-N(2)-Mn(1)                 | 122.70(19) |

|                               |            |                                 |            |
|-------------------------------|------------|---------------------------------|------------|
| O(2)-Mn(1)-O(3) <sup>#1</sup> | 148.93(7)  | C(19)-O(2)-Mn(1)                | 145.63(17) |
| O(2)-Mn(1)-O(4)               | 97.13(7)   | C(30)-O(3)-Mn(1) <sup>#2</sup>  | 83.49(17)  |
| O(2)-Mn(1)-N(1)               | 91.29(8)   | C(19) <sup>#3</sup> -O(4)-Mn(1) | 132.11(16) |
| O(2)-Mn(1)-N(2)               | 98.81(8)   | C(12) <sup>#4</sup> -N(1)-Mn(1) | 128.7(2)   |
| C(7)-N(2)-Mn(1)               | 130.95(17) | O(4)-Mn(1)-N(1)                 | 88.68(8)   |
| O(4)-Mn(1)-O(3) <sup>#1</sup> | 113.87(7)  | O(4)-Mn(1)-N(2)                 | 83.65(8)   |

Symmetry codes

for 1, #1  $x+1/2, -y+3/2, z-1/2$  #2  $x-1/2, y+1/2, z-1$  #3  $x-1/2, -y+3/2, z+1/2$   
for 2, #1  $1/2+X, 1/2+Y, +Z$  #2  $1-X, 1+Y, 3/2-Z$  #3  $-1/2+X, -1/2+Y, +Z$  #4  $1-X, -1+Y, 3/2-Z$   
for 3, #1  $-1/2+X, -Y, 1/2+Z$  #2  $1+X, -1+Y, +Z$  #3  $1/2+X, -Y, -1/2+Z$  #4  $-1+X, 1+Y, +Z$   
for 4, #1  $x, -y, z+1/2$  #2  $x-1/2, -y+3/2, z-1/2$  #3  $x, -y, z-1/2$  #4  $x+1/2, -y+3/2, z+1/2$   
for 5, #1  $-x+2, -y+1, -z+1$  #2  $x+1, y-1, z$  #3  $x-1, y+1, z$   
for 6, #1  $-x+3/2, y-1/2, -z+1/2$  #2  $-x+3/2, y+1/2, -z+1/2$  #3  $-x+1/2, y-1/2, -z+1/2$   
#4  $x+1/2, -y+1/2, z+1/2$

**Fig. S1.**

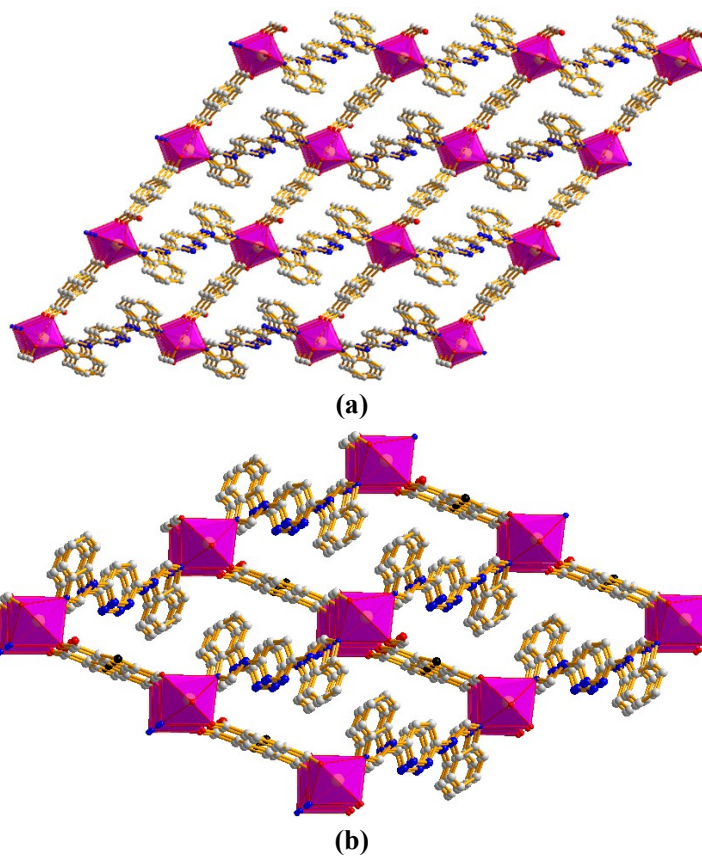

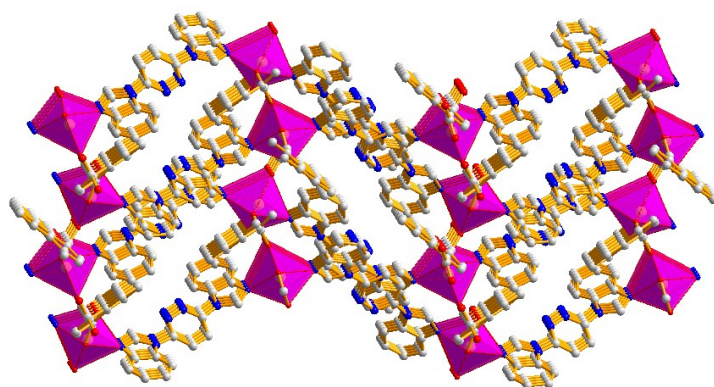

(c)

Fig. S1. (a) The 3D framework structure of **3**; (b) the 3D framework structure of **4**; (c) the 3D framework structure of **6**.

Fig. S2. PXRD patterns of 1-6.

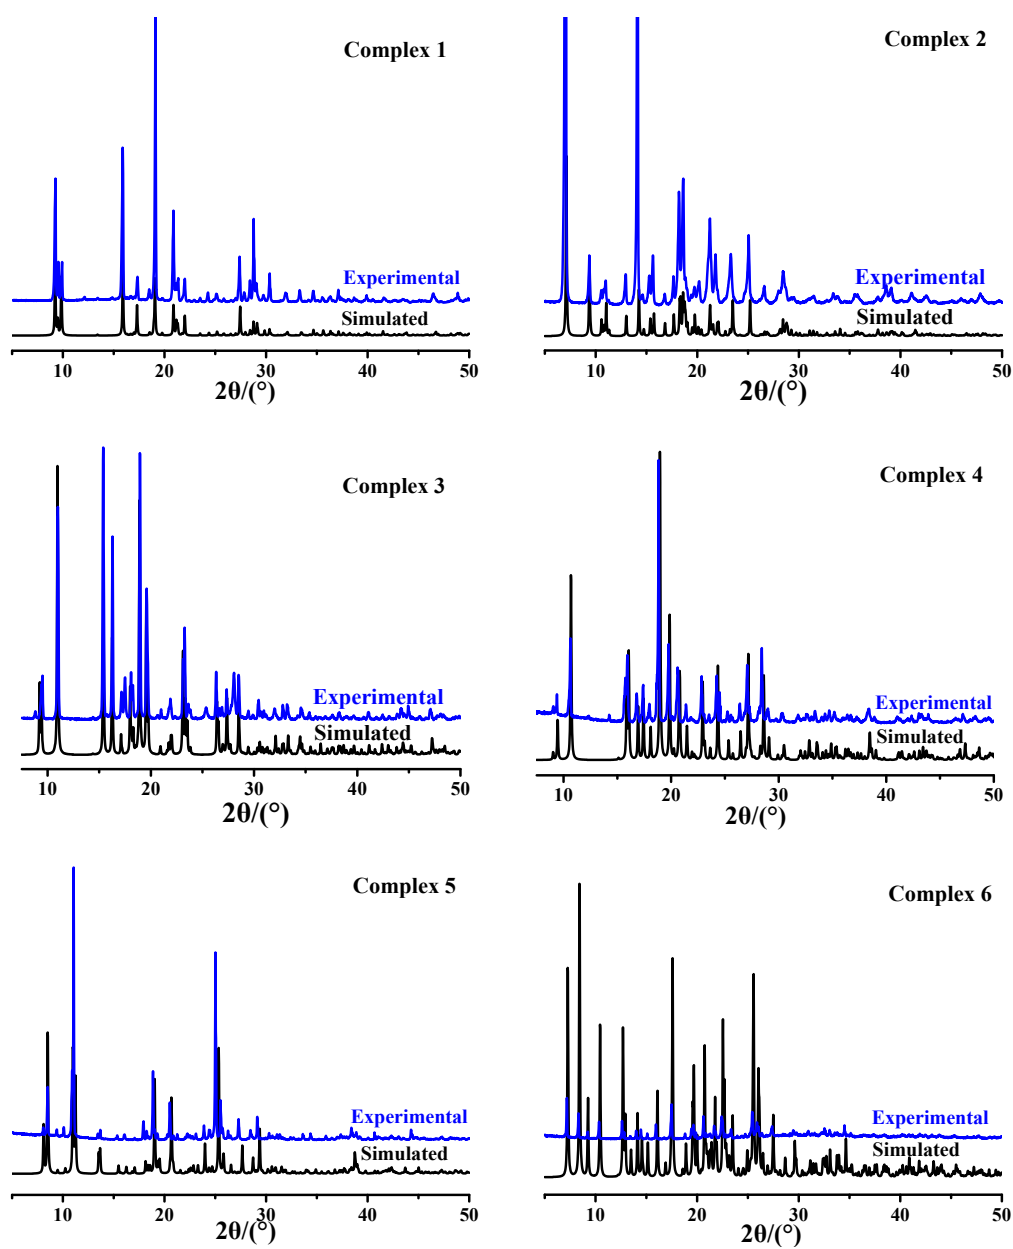

Fig. S3. TG curves for complexes 1-6.

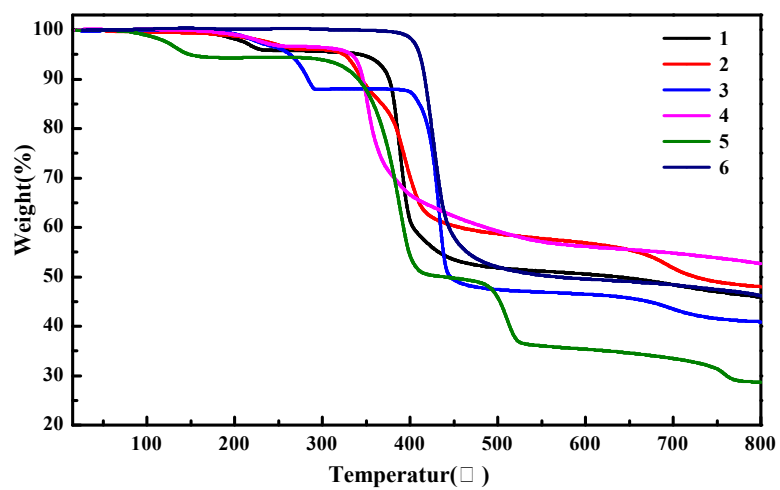

Supplement: c9ra03082d1.pdf [file c9ra03082d1.pdf]
